# Supplementary material
Source: publisher figshare collection journal article supplement (https://gsapubs.figshare.com/ndownloader/files/22758017)
Supplement: Supplementary file 1 [file 22758017]

## Data Repository Item

### Cosmogenic sample collection, preparation and analysis.

Alluvium was collected from active channel beds and sieved in the field to yield a sample with size fraction of 125-250  $\mu\text{m}$ . Sample locations are listed in Table DR1. Sample preparation has been adapted from protocols of Bierman et al. (2002) and Kohl and Nishiizumi (1992). We treated the sediment in 6 M HCl on a shaker table for 24 hours to remove carbonates. Heavy liquid separation in lithium polytungstate (LST) was used to remove minerals from the sample with a density greater than quartz. Pure quartz separates were prepared by etching the remaining sediment in a solution of ~2% HF and ~1% HNO<sub>3</sub> with a sample to acid ratio of seven grams per litre. Three 24 hour etches in an ultrasonic bath at 40°C were performed, with the samples rinsed between each etch. The quartz separates were spiked with 150-200  $\mu\text{g}$  of Be carrier (Be 1000 mg/l standard, Spectrosol), and dissolved in concentrated HF (48%). Several fumes in HClO<sub>4</sub> converted fluorides to perchlorates, and the samples were passed through anion exchange columns to remove contaminants, principally Fe. Precipitation at pH 4.0 followed by precipitation at pH 8.5 reduced Ti and other contaminants. Be was separated from Al using cation exchange. Be(OH)<sub>2</sub> gels were precipitated and water rinsed several times before drying. Firing was performed over a butane-propane flame and the BeO mixed with Ag. See Binnie (2005) for further details.

<sup>10</sup>Be/<sup>9</sup>Be was measured by Accelerator Mass Spectrometry using the 14UD accelerator at the Australian National University. The continuous beam monitor method of Middleton and Klein (1987) was used. Measurements were normalised to the NIST SRM 4325 standard with an assumed <sup>10</sup>Be/<sup>9</sup>Be ratio of  $3.0 \times 10^{-11}$ . <sup>10</sup>Be loading incurred during sample preparation was measured by laboratory blanks

prepared in tandem with every seven samples. The measured  $^{10}\text{Be}/^9\text{Be}$  ratios of these blanks were between  $11\text{-}14 \times 10^{-15}$ , which is due principally to  $^{10}\text{Be}$  and  $^9\text{Be}$  intrinsic to the beryllium standard. The respective numbers of atoms recorded by the blanks were subtracted from the appropriate sample measurements to yield the  $^{10}\text{Be}$  concentrations listed in Table DR1. The  $1\sigma$  uncertainty in our nuclide concentrations includes the propagated analytical uncertainty of the sample  $^{10}\text{Be}/^9\text{Be}$  ratio, respective laboratory blank  $^{10}\text{Be}/^9\text{Be}$  ratio and a 1% analytical uncertainty in our  $^9\text{Be}$  carrier mass determinations (Table DR 1).

### **Cosmogenic $^{10}\text{Be}$ production rates**

Cosmogenic nuclide production rate scaling factors, for both spallogenic and muogenic production, were calculated for each cell in a USGS National Elevation Dataset 1/9-arcsecond (approximately 10m resolution). From this, the mean production rate of each basin sampled was derived. Spallogenic production rate scaling factors for altitude and latitude were modelled using the functions of Lal (1991). The functions of Dunai (2000) were also used to derive spallogenic production rate scaling factors. The difference between the two methods at the latitudes and altitudes of the San Bernardino Mountains is within the 10% uncertainty assumed on production rates (see below). Muogenic production rate scaling factors were modelled using the functions of Stone (2000). Using the maximum and minimum elevations, we derive an approximation for the angle of overall inclination of each basin and apply the term of the equation given by Dunne et al. (1999) for slope angle shielding (Table DR2). The reduction of production rates due to modelling the effect of topographic shielding in this way ranges from 0% to <6%. Shielding by distant topography is negligible (<1%) and not included. Snow shielding effects were accounted for following Gosse and Phillips (2001), using modern snowpack data (Minnich, 1989). Reduction in production rates due to

shielding by snow cover ranges from <1% to <4% (Table DR2). See Binnie (2005) for further explanation.

### **Cosmogenic $^{10}\text{Be}$ derived denudation rates**

Denudation rates were derived using the model and constants given by Granger et al. (2001), assuming a high latitude, sea level spallation production rate of  $5.1 \text{ atoms.g}^{-1}.\text{yr}^{-1}$ . (Stone, 2000), and a bedrock density of  $2.6 \pm 0.1 \text{ g.cm}^{-2}$ . We ignore systematic errors but assume a 10% error on both muogenic and spallogenic production rates accounts for any variability in production rates between basins due to changes in amounts of vegetative shielding, the influence of a variable geomagnetic field intensity over the different denudation rate averaging periods and time dilation effects of high energy muons (Riebe et al. 2004).

### **Denudation rate averaging times**

The averaging period of denudation rate measurements derived using cosmogenic nuclide analysis are a function of the depth of nuclide production in rock and the rate at which that thickness of rock is removed by processes of denudation. The different attenuation lengths of muons and fast neutrons produce profiles of cosmogenic nuclide production which extend to different depths within the Earth's surface. In order to obtain an averaging time which reflects these different profiles we took a mean of the spallogenic, fast and slow muogenic attenuation lengths, weighted by the relative contribution each production mechanism has made to the cosmogenic nuclide concentration measured in our samples. Hence, the averaging periods shown in Table DR3 should not be considered absolute values but reflect the approximate timespans over which our denudation rate measurements apply.

**Mean hillslope gradient**

Mean slope gradients were calculated for each sampled basin using 10 m-grid U.S. National Elevation Data set digital elevation model (DEM) data. Slope gradients derived from DEMs can be sensitive to grid size, but Zhang and Montgomery (1994) have shown that a 10 m-grid DEM will produce small errors for topography with a range of gradients similar to those in the catchments sampled here.

**Designation of detachment or transport-limited basins.**

We allocated those basins we sampled for cosmogenic  $^{10}\text{Be}$  analysis as being predominantly detachment (weathering)-limited or transport-limited based on observations made in the field and observations stated in published literature. Those basins where there was significant evidence for both transport-limited and detachment-limited processes are considered as intermediate.

On the plateau surface of the Big Bear block basins 17, 18, 19 and 20 have >50% of their surface area mantled by a deeply weathered granitic horizon. This horizon is considered to have formed prior to orogenesis (Oberlander, 1972; Sadler and Reeder 1983; Meisling and Weldon 1989) and so its presence suggests denudation rates in these basins are predominantly limited by the rate of mass transport. Basins 14 and 15 also retain the weathered horizon, however, in these cases the basins are situated on the northern escarpment and there is evidence that large portions of the weathering horizon have been removed. As such we consider basins 14 and 15 to be intermediate rather than predominantly transport-limited. Basin 19 also drains the northern escarpment but unlike basins 14 and 15 the majority of the area of basin 19 lies on the plateau surface of the Big Bear block and >50% of this basin is mantled by the weathered horizon. As such we consider basin 19 to be predominantly transport-limited. Basin 16 lies on the plateau of the Big Bear block, however, the weathered

mantle appears to have been mostly stripped and so we consider basin 16 to be intermediate.

There is published literature detailing the occurrence of rapid mass movement in the basins we sampled on Yucaipa Ridge block (Sadler and Morton 1989; Davis, 1998; Tan 1990; Tan and Griffen 1995; Morton and Hauser 2001). From field observations we verified that the steep terrain of this area is dominated by the occurrence of shallow landsliding, rockfall, dry-ravel and debris flow processes. As such we consider basins 1, 2, 3, 4 and 5 to be experiencing predominantly detachment-limited denudational processes. Basin 6 is also located on Yucaipa Ridge. However, doubts have been expressed as to the occurrence of rapid mass movement in this basin (Sadler and Morton 1989) and so we consider it to be intermediate. The basins sampled along the southern escarpment of the Big Bear block were all considered to be intermediate as there is no evidence to suggest either transport or detachment-limited processes dominate the denudational regime.

## References

- Bierman, P.R., Caffee, M.W., Thompson-Davis, P., Marsella, K., Pavich, M.J., Colgan, P., Mickelson, D., M., and Larsen, J., 2002, Rates and timing of Earth surface processes from in situ-produced cosmogenic Be-10, *in* Grew, E.S., ed., Beryllium: mineralogy, petrology, and geochemistry, Volume 50, p. 147-205.
- Binnie, S.A., 2005, Deriving basin-wide denudation rates from cosmogenic radionuclides, San Bernardino Mountains, California [PhD thesis], University of Edinburgh.
- Dunai, T.J., 2000, Scaling factors for production rates of in situ produced cosmogenic nuclides; a critical re-evaluation: *Earth and Planetary Science Letters*, v. 176, p. 157-169.
- Dunne, J., Elmore, D., and Muzikar, P., 1999, Scaling factors for the rates of production of cosmogenic nuclides for geometric shielding and attenuation at depth on sloped surfaces: *Geomorphology*, v. 27, p. 3-11.
- Gosse, J.C., and Phillips, F.M., 2001, Terrestrial in situ cosmogenic nuclides: theory and application: *Quaternary Science Reviews*, v. 20, p. 1475-1560.

- Granger, D.E., Riebe, C.S., Kirchner, J.W., and Finkel, R.C., 2001, Modulation of erosion on steep granitic slopes by boulder armoring, as revealed by cosmogenic  $^{26}\text{Al}$  and  $^{10}\text{Be}$ : *Earth and Planetary Science Letters*, v. 186, p. 269-281.
- Kohl, C.P., and Nishiizumi, K., 1992, Chemical isolation of quartz for measurement of in situ-produced cosmogenic nuclides: *Geochimica et Cosmochimica Acta*, v. 56, p. 3583-3587.
- Lal, D., 1991, Cosmic ray labeling of erosion surfaces: in situ nuclide production rates and erosion models: *Earth and Planetary Science Letters*, v. 104, p. 424-439.
- Meisling, K.E., and Weldon, R.J., 1989, Late Cenozoic tectonics of the northwestern San Bernardino Mountains, Southern California: *Geological Society of America Bulletin*, v. 101, p. 106-128.
- Middleton, R., and Klein, J., 1987, Al-26 - Measurement and applications: *Philosophical Transactions of the Royal Society of London Series A-Mathematical Physical and Engineering Sciences*, v. 323, p. 121-143.
- Minnich, R.A., 1989, Climate, fire and landslides in Southern California, *in* Sadler, P. M., and Morton, D.M., eds., *Landslides in a semi-arid environment with emphasis on the inland valleys of Southern California*, Publications of the Inland Geological Society, v. 2, p. 91-100.
- Morton, D.M. and Hauser, R.M., 2001, A debris avalanche at Forest Falls, San Bernardino County, California, July 11, 1999: United States Geological Survey Open-File Report 01-146.
- Oberlander, T.M., 1972, Morphogenesis of granitic boulder slopes in the Mojave Desert, California: *Journal of Geology*, v. 80, p. 1-20.
- Riebe, C.S., Kirchner, J.W., and Finkel, R.C., 2004, Sharp decrease in long-term chemical weathering rates along an altitudinal transect: *Earth and Planetary Science Letters*, v. 218, p. 421-434.
- Sadler, P.M., and Morton, D.M., 1989, Landslides in the uppermost Santa Ana Basin and the adjacent San Bernardino Mountains of Southern California, *in* Sadler, P.M., and Morton, D.M., eds., *Landslides in a semi-arid environment with emphasis on the inland valleys of Southern California*, publications of the Inland Geological Society, v. 2, p. 356-386.
- Sadler, P.M., and Reeder, W.A., 1983, Upper Cenozoic, quartzite-bearing gravels of the San Bernardino Mountains, Southern California; recycling and mixing as a result of transpressional uplift, *in* Andersen, D.W., and Rymer, M.J., eds., *Tectonics and Sedimentation Along the Faults of the San Andreas System*, Los Angeles, CA, Soc. Econ. Paleontol. and Mineral., Pac. Sect., p. 45-57.
- Stone, J.O., 2000, Air pressure and cosmogenic isotope production: *Journal of Geophysical Research-Solid Earth*, v. 105, p. 23753-23759.

- Tan, S.S. and Griffen, D. G., 1995, Rockfall and stream-related debris-flow hazards of the Forest Falls area, San Bernardino County, California: Landslide Hazard Identification Map No. 43. California Department of Conservation, Division of Mines and Geology Open File Report, 95-17
- Tan, S.S., 1990, Landslide hazards in the Yucaipa and Forest Falls quadrangles, San Bernardino County, California: Landslide Hazard Identification Map No. 18. California Department of Conservation, Division of Mines and Geology Open File Report, 90-5
- Zhang, W.H., and Montgomery, D.R., 1994, Digital elevation model grid size, landscape representation, and hydrologic simulations: Water Resources Research, v. 30, p. 1019–1028

TABLE DR1. SAMPLE CHARACTERISTICS

| Basin number | Sample location<br>(decimal degrees) |           | Quartz mass<br>(g) | <sup>9</sup> Be carrier mass<br>(μg) | <sup>10</sup> Be/ <sup>9</sup> Be ratio<br>(x10 <sup>-15</sup> ) | Laboratory blank<br><sup>10</sup> Be/ <sup>9</sup> Be ratio<br>(x10 <sup>-15</sup> ) | <sup>10</sup> Be concentration<br>(x10 <sup>3</sup> atoms.g <sup>-1</sup> ) |
|--------------|--------------------------------------|-----------|--------------------|--------------------------------------|------------------------------------------------------------------|--------------------------------------------------------------------------------------|-----------------------------------------------------------------------------|
|              | Latitude                             | Longitude |                    |                                      |                                                                  |                                                                                      |                                                                             |
| 1            | 34.0845                              | -116.9685 | 54.47              | 206.5 ± 2.1                          | 35 ± 4                                                           | 13 ± 2                                                                               | 5.6 ± 1.1                                                                   |
| 2            | 34.0869                              | -116.9418 | 58.40              | 206.5 ± 2.1                          | 33 ± 3                                                           | 13 ± 2                                                                               | 4.7 ± 0.9                                                                   |
| 3            | 34.0486                              | -116.9307 | 52.89              | 207.6 ± 2.1                          | 54 ± 4                                                           | 13 ± 2                                                                               | 10.8 ± 1.2                                                                  |
| 4            | 34.0532                              | -116.9393 | 55.92              | 205.1 ± 2.1                          | 57 ± 4                                                           | 13 ± 2                                                                               | 10.8 ± 1.1                                                                  |
| 5            | 34.0894                              | -116.9554 | 49.61              | 203.4 ± 2.0                          | 54 ± 4                                                           | 14 ± 2                                                                               | 10.1 ± 1.2                                                                  |
| 6            | 34.0945                              | -116.9832 | 79.48              | 204.6 ± 2.0                          | 256 ± 22                                                         | 11 ± 3                                                                               | 42.1 ± 3.8                                                                  |
| 7            | 34.1854                              | -116.9807 | 58.87              | 205.7 ± 2.1                          | 58 ± 5                                                           | 14 ± 2                                                                               | 10.3 ± 1.3                                                                  |
| 8            | 34.1852                              | -116.9767 | 68.64              | 207.8 ± 2.1                          | 114 ± 9                                                          | 11 ± 3                                                                               | 20.8 ± 1.9                                                                  |
| 9            | 34.1825                              | -116.9483 | 69.88              | 156.5 ± 1.6                          | 190 ± 13                                                         | 11 ± 3                                                                               | 26.8 ± 2.0                                                                  |
| 10           | 34.2083                              | -117.0123 | 56.92              | 206.3 ± 2.1                          | 318 ± 21                                                         | 11 ± 3                                                                               | 74.4 ± 5.2                                                                  |
| 11           | 34.1702                              | -117.0567 | 71.87              | 206.3 ± 2.1                          | 51 ± 6                                                           | 11 ± 3                                                                               | 7.7 ± 1.3                                                                   |
| 12           | 34.1926                              | -116.9318 | 66.74              | 205.1 ± 2.1                          | 384 ± 22                                                         | 13 ± 2                                                                               | 62.0 ± 3.0                                                                  |
| 13           | 34.1961                              | -116.9268 | 47.61              | 201.2 ± 2.0                          | 192 ± 9                                                          | 14 ± 2                                                                               | 50.3 ± 2.7                                                                  |
| 14           | 34.3940                              | -117.0544 | 50.52              | 205.6 ± 2.1                          | 384 ± 22                                                         | 13 ± 2                                                                               | 101.1 ± 6.1                                                                 |
| 15           | 34.3967                              | -117.0757 | 29.88              | 208.7 ± 2.1                          | 248 ± 15                                                         | 11 ± 3                                                                               | 110.6 ± 7.2                                                                 |
| 16           | 34.2756                              | -117.0311 | 44.28              | 208.0 ± 2.1                          | 324 ± 17                                                         | 14 ± 2                                                                               | 97.3 ± 5.5                                                                  |
| 17           | 34.2787                              | -117.0631 | 47.08              | 207.3 ± 2.1                          | 448 ± 19                                                         | 14 ± 2                                                                               | 127.7 ± 5.8                                                                 |
| 18           | 34.2800                              | -117.0414 | 53.28              | 206.3 ± 2.1                          | 709 ± 38                                                         | 11 ± 3                                                                               | 180.6 ± 10.0                                                                |
| 19           | 34.4040                              | -117.0626 | 27.97              | 155.2 ± 1.6                          | 238 ± 17                                                         | 11 ± 3                                                                               | 84.2 ± 6.5                                                                  |
| 20           | 34.3748                              | -117.0914 | 39.70              | 201.3 ± 2.0                          | 649 ± 27                                                         | 14 ± 2                                                                               | 215.1 ± 9.4                                                                 |



TABLE DR2. PRODUCTION RATE SCALING FACTORS

| Basin number | Scaling factor of latitude and altitude |          | Slope of basin long-axis ( $\alpha$ ) | Scaling factor of topographic shielding* | Scaling factor of snow shielding† | Total spallogenic production scaling factor | Total muogenic production scaling factor |
|--------------|-----------------------------------------|----------|---------------------------------------|------------------------------------------|-----------------------------------|---------------------------------------------|------------------------------------------|
|              | spallogenic                             | muogenic |                                       |                                          |                                   |                                             |                                          |
| 1            | 3.79                                    | 2.03     | 26.8                                  | 0.98                                     | 0.98                              | 3.65                                        | 1.98                                     |
| 2            | 4.09                                    | 2.19     | 39.2                                  | 0.94                                     | 0.98                              | 3.79                                        | 2.07                                     |
| 3            | 4.44                                    | 2.30     | 27.9                                  | 0.98                                     | 0.98                              | 4.26                                        | 2.25                                     |
| 4            | 3.97                                    | 2.15     | 29.1                                  | 0.97                                     | 0.98                              | 3.80                                        | 2.10                                     |
| 5            | 3.82                                    | 2.11     | 34.6                                  | 0.96                                     | 0.98                              | 3.61                                        | 2.02                                     |
| 6            | 2.88                                    | 1.78     | 19.7                                  | 0.99                                     | 0.99                              | 2.83                                        | 1.76                                     |
| 7            | 3.81                                    | 2.10     | 22.8                                  | 0.99                                     | 0.99                              | 3.71                                        | 2.07                                     |
| 8            | 4.23                                    | 2.24     | 17.1                                  | 0.99                                     | 0.98                              | 4.10                                        | 2.22                                     |
| 9            | 4.33                                    | 2.27     | 16.0                                  | 0.99                                     | 0.98                              | 4.20                                        | 2.26                                     |
| 10           | 3.92                                    | 2.14     | 18.3                                  | 0.99                                     | 0.98                              | 3.81                                        | 2.12                                     |
| 11           | 3.63                                    | 2.03     | 15.5                                  | 1.00                                     | 0.98                              | 3.55                                        | 2.02                                     |
| 12           | 4.41                                    | 2.30     | 19.0                                  | 0.99                                     | 0.98                              | 4.30                                        | 2.28                                     |
| 13           | 4.36                                    | 2.28     | 21.3                                  | 0.99                                     | 0.98                              | 4.24                                        | 2.25                                     |
| 14           | 3.12                                    | 1.74     | 12.0                                  | 1.00                                     | 0.99                              | 3.09                                        | 1.74                                     |
| 15           | 2.93                                    | 1.68     | 8.8                                   | 1.00                                     | 0.99                              | 2.90                                        | 1.67                                     |
| 16           | 4.54                                    | 2.19     | 15.6                                  | 0.99                                     | 0.97                              | 4.39                                        | 2.18                                     |
| 17           | 3.79                                    | 1.96     | 3.9                                   | 1.00                                     | 0.98                              | 3.71                                        | 1.96                                     |
| 18           | 3.95                                    | 2.01     | 5.6                                   | 1.00                                     | 0.98                              | 3.86                                        | 2.01                                     |
| 19           | 3.28                                    | 1.79     | 10.1                                  | 1.00                                     | 0.99                              | 3.23                                        | 1.79                                     |
| 20           | 3.40                                    | 1.84     | 5.6                                   | 1.00                                     | 0.98                              | 3.35                                        | 1.83                                     |

\* Using the equation of Dunne et al., (1999),  $S=1-(3.6 \times 10^{-6} \alpha^{2.64})$ , where S is the scaling factor, and  $\alpha$  is the slope angle of the basins long-axis. See text for discussion.

† Snow shielding is considered for production by spallation only.

TABLE DR3. AVERAGING TIME

| Basin<br>number | Denudation rate<br>averaging period<br>(ka)* |
|-----------------|----------------------------------------------|
| 1               | 1.0                                          |
| 2               | 0.8                                          |
| 3               | 1.6                                          |
| 4               | 1.9                                          |
| 5               | 2.0                                          |
| 6               | 10.4                                         |
| 7               | 1.8                                          |
| 8               | 3.3                                          |
| 9               | 4.1                                          |
| 10              | 12.9                                         |
| 11              | 1.4                                          |
| 12              | 9.3                                          |
| 13              | 7.7                                          |
| 14              | 21.6                                         |
| 15              | 25.6                                         |
| 16              | 13.8                                         |
| 17              | 22.2                                         |
| 18              | 29.9                                         |
| 19              | 17.1                                         |
| 20              | 42.1                                         |

\* See text for discussion of how  
averaging times are evaluated.
